# Supplementary material for: End-Triassic Extinction in a Carbonate Platform From Western Tethys: A Comparison Between Extinction Trends and Geochemical Variations
Source: Frontiers journal article supplement (doi:10.3389/feart.2022.875466), 2022-04-26
Supplement: Table_1.XLSX [file Table_1.XLSX]

## Sheet: Foglio1
Code	Facies	Occurrence in Units A-B-C	Environmental interpretations
f1	Bioturbated mudstone/wackestone	A-B-C	Low energy restricted inner lagoon
f2	Packstone/grainstone with large megalodontoids shells	A	Low to medium energy open lagoon
f3	Wackestone/packstone with small and rare megalodontoids shells	B	Medium energy lagoon
f4	Coral bafflestone	A	Medium to high energy outer lagoon
f5	Algal grainstone	A	High energy outer lagoon
f6	Oolitic grainstone/packstone	B	High energy storm events
f7	Megalodontoids floatstone/rudstone	A	High energy storm events
f8	Thaumatoporella wackestone/packstone	C	Low energy inner lagoon
f9	Intertidal microbial laminites	A-B-C	Intertidal microbial mats
f10	Microbial laminites	A-B-C	Intertidal/supratidal
f11	Flat-pebble conglomerates	A-B-C	Supratidal basal lag
f12	Black-pebble conglomerates	A-B-C	Supratidal basal lag
f13	Reddish/gree marly limestone	A-B-C	Supratidal
